# Supplementary material for: Design of BODIPY functional ZIF-90 towards enhanced visible-light driven antibacterial performance
Source: Royal Society of Chemistry journal article supplement (doi:10.1039/d3nj00397c), 2023-01-01
Supplement: d3nj00397c1.pdf [file d3nj00397c1.pdf]

Design of BODIPY functional ZIF-90 towards enhanced visible-light driven  
antibacterial performance

Dong-Mei Chen, Guang-Qi He, Qiu-Yun Chen, \* Gao-Ji Wang, Cheng Chen, Ying  
Dong, Ling-Ling Qu\*

School of Chemistry and Chemical Engineering, Jiangsu University, Zhenjiang,  
212013, China

E-mail: [chenqy@ujs.edu.cn](mailto:chenqy@ujs.edu.cn); [llqu@ujs.edu.cn](mailto:llqu@ujs.edu.cn)

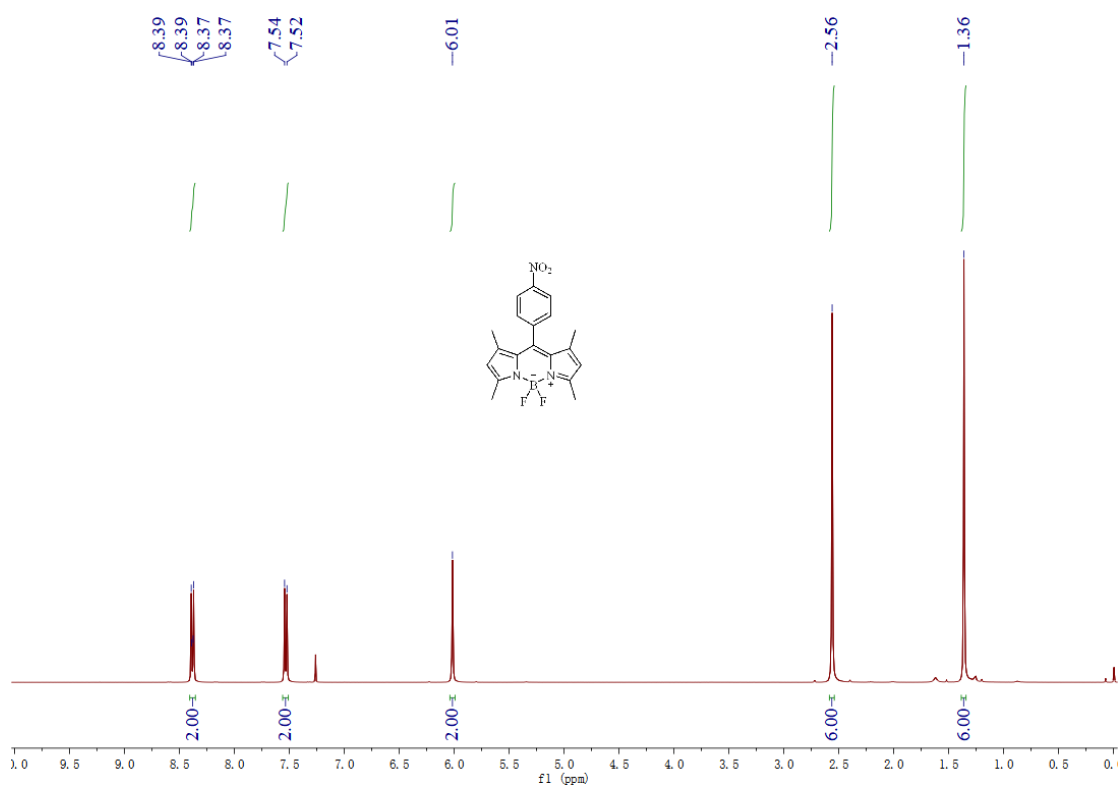

Fig S1 <sup>1</sup>H NMR spectra of NO<sub>2</sub>-BODIPY in chloroform (CDCl<sub>3</sub>).

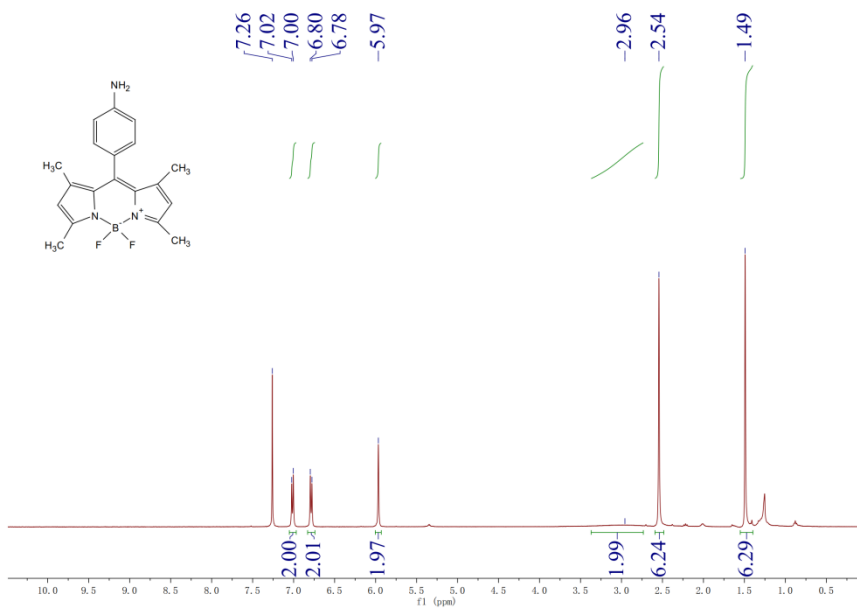

Fig S2  $^1\text{H}$  NMR spectra of  $\text{NH}_2\text{-BODIPY}$  in chloroform ( $\text{CDCl}_3$ ).

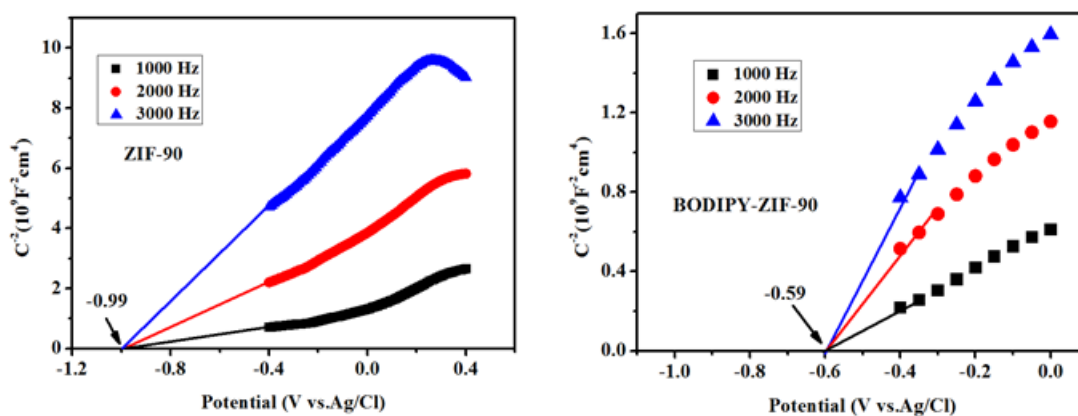

Fig S3 Mott-Schottky plots of ZIF-90 (left) and BODIPY-ZIF-90 (right) at three frequencies (1000 Hz, 2000 Hz and 3000 Hz).

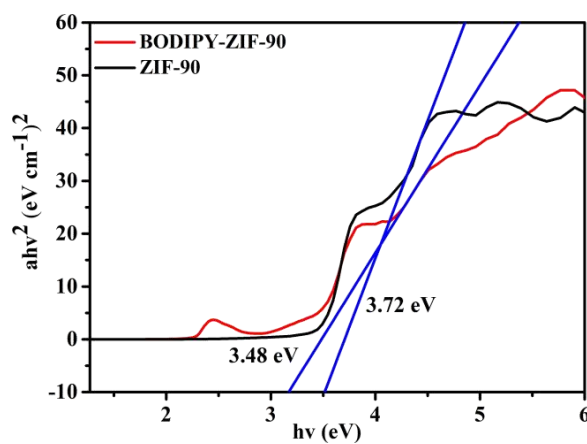

Fig S4 The optical bandgaps of ZIF-90 and BODIPY-ZIF-90.

| Antibacterial agent | MIC ( $\mu\text{g/mL}$ ) |                  | MBC ( $\mu\text{g/mL}$ ) |                  | Light source     | References |
|---------------------|--------------------------|------------------|--------------------------|------------------|------------------|------------|
|                     | <i>E. coli</i>           | <i>S. aureus</i> | <i>E. coli</i>           | <i>S. aureus</i> |                  |            |
| BODIPY-ZIF-90       | 5                        | 5                | 7.5                      | 5                | LED (7W)         | this work  |
| ZIF-90              | 120                      | 60               |                          |                  |                  | S1         |
| ZIF-90-OM           | 60                       | 60               |                          |                  |                  | S1         |
| ZIF-8               | 31.25                    | 31.25            | 250                      | 250              | 808 nm NIR laser | S2         |
| Ag/ZnO/ZIF-8        | 3.12                     | 3.12             | 6.25                     | 6.25             | 300 W Xenon Lamp | S3         |

Table S1. Comparison of MIC and MBC for BODIPY-ZIF-90 with different ZIFs composites.

## References

- [S1] D. C. Mei, H. Li, L. J Liu, L. C. Jiang, C. H. Zhang, X. R. Wu, H. X. Dong and F. Q. Ma, Chem. Eng. J, 2021, **425**, 130468.
- [S2] Z. W. Liu, L. Tan, X. M. Liu, Y. Q. Liang, Y. F. Zheng, K. W. K. Yeung, Z. D. Cui, S. L. Zhu, Z. Y. Li and S. L. Wu, Colloids Surf. B, 2020, **188**, 110781.
- [S3] J. Cui, D. Wu, Z. Li, G. A. Zhao, J. S. Wang, L. Wang and B. X. Niu, Ceram. Int., 2021, **47**, 15759-15770.
